# Supplementary material for: Machine Learning Analysis of Land Use Change Dynamics in Malawi’s Chia Lagoon
Source: Research Square preprint supplement (doi:10.21203/rs.3.rs-8068958/v1), 2025-12-03
Supplement: Supplementary file 1 [file af1f93f267dffd930a6eff8c.docx]

**Highlights**

1. First Machine-Learning Assessment of Chia Lagoon’s Two-Decade Ecological Transformation
2. Rapid Degradation Followed by Fragile Regeneration
3. Machine Learning as a Game-Changer for Conservation Monitoring
4. Alarming Link Between Land-Use Change and Biodiversity Threats
5. Policy-Driven Restoration and Monitoring Imperatives
